# Supplementary material
Source: MDPI journal article supplement (https://www.mdpi.com/1996-1073/16/22/7671)
Supplement: s1 [file s1]

# Wind and Solar Energy Generation Potential Features in Extreme-Northern Amazon Using Reanalysis Data

Jean Souza dos Reis <sup>1\*</sup>, Nicolas de Assis Bose <sup>1,2</sup>, Ana Cleide Bezerra Amorim <sup>1</sup>, Vanessa Almeida <sup>1</sup>, Luciano Andre Cruz Bezerra <sup>1</sup>, Leonardo de Lima Oliveira <sup>1</sup>, Samira de Azevedo Emiliavaca <sup>1</sup>, Maria de Fátima Alves de Matos <sup>1</sup>, Nickollas Elias Targino Pereira <sup>1</sup> and Raniere Rodrigues Melo de Lima <sup>1</sup>

<sup>1</sup> SENAI Institute of Innovation - Renewable Energies; Av. Capitão Mor-Gouveia 2770, Lagoa Nova, Natal 59063-400, Brazil; nicolas@isi-er.com.br (N.A.B); anacleide@isi-er.br (A.C.BA); vanessa@isi-er.br (V.A); luciano@isi-er.br (L.A.C.B); leonardo@isi-er.br (L.L.O); samira@isi-er.br (S.A.E); fatima@isi-er.br (M.F.A.M); nickollas@isi-er.br (N.E.T.P.); raniere@isi-er.br (R.R.M.L)

<sup>2</sup> Federal University of Rio Grande do Sul, Fundação Universidade do Rio Grande, Carreiros, 96203900, Rio Grande, Brazil

\* Correspondence: jeanreis@isi-er.com.br

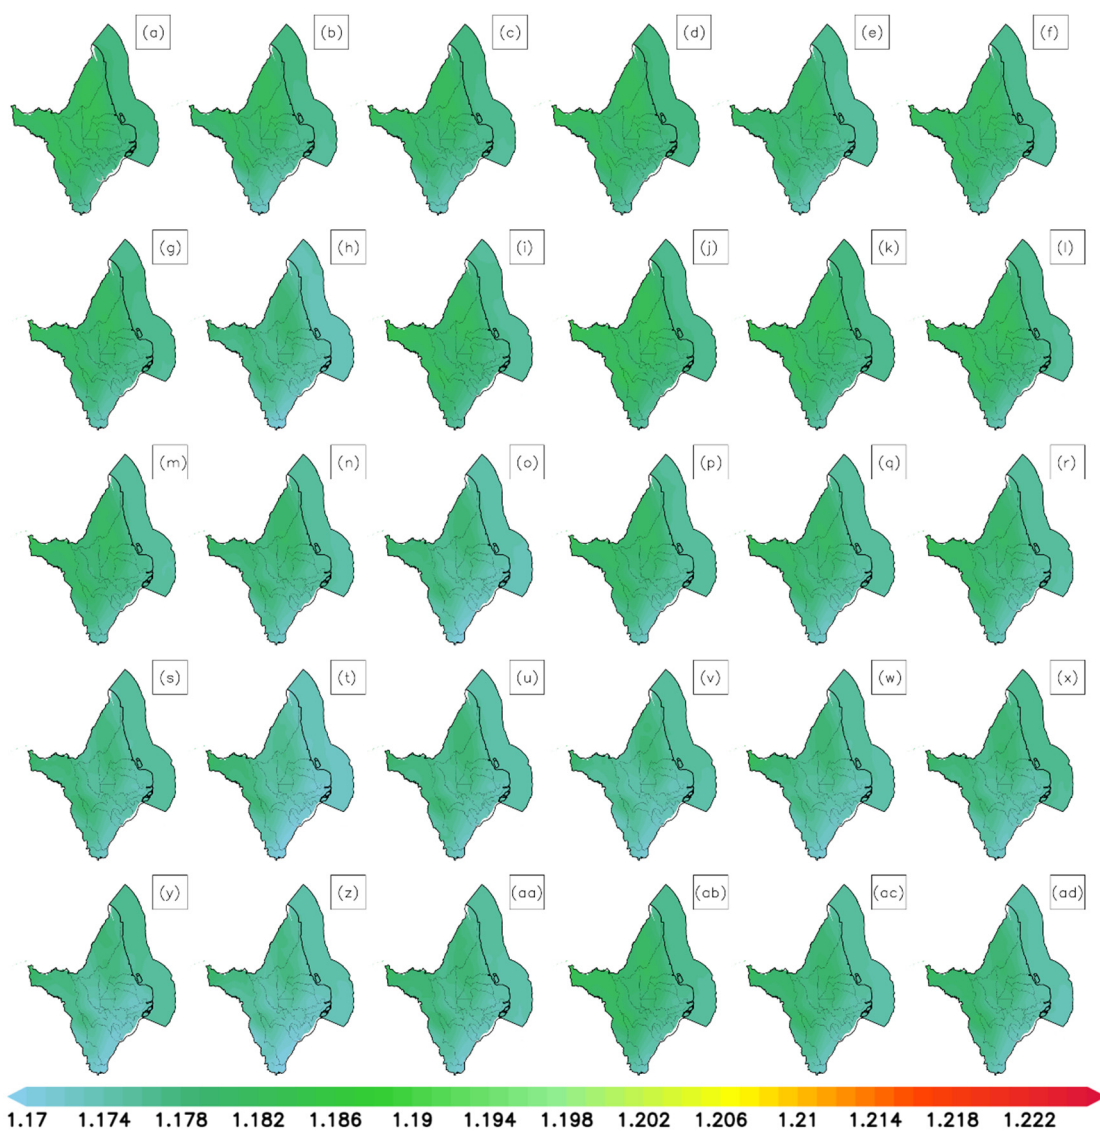

Figure S1. Mean Standard deviation of air density of 30 years.

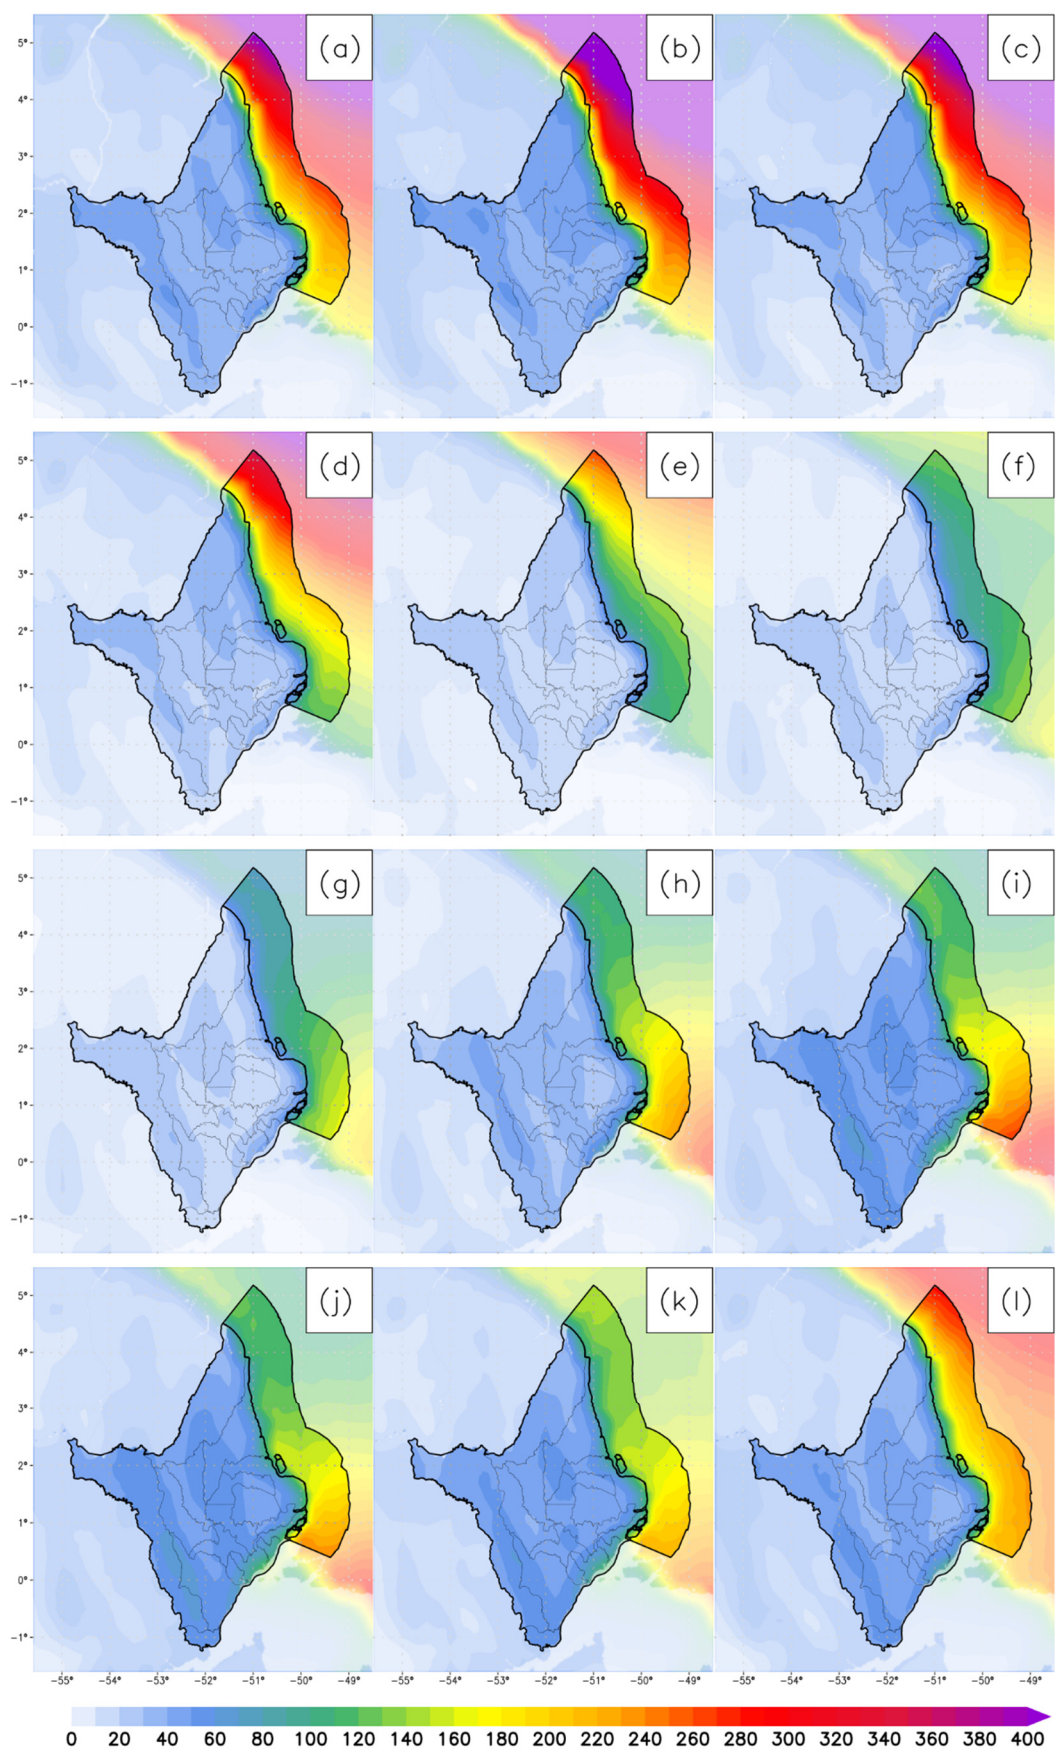

**Figure S2.** Mean monthly variability of Wind Power Density (W/m<sup>2</sup>) of 30 years in (a) January, (b) February, (c) March, (d) April, (e) May, (f) June, (g) July, (h) August, (i) September, (j) October, (k) November and (l) December.

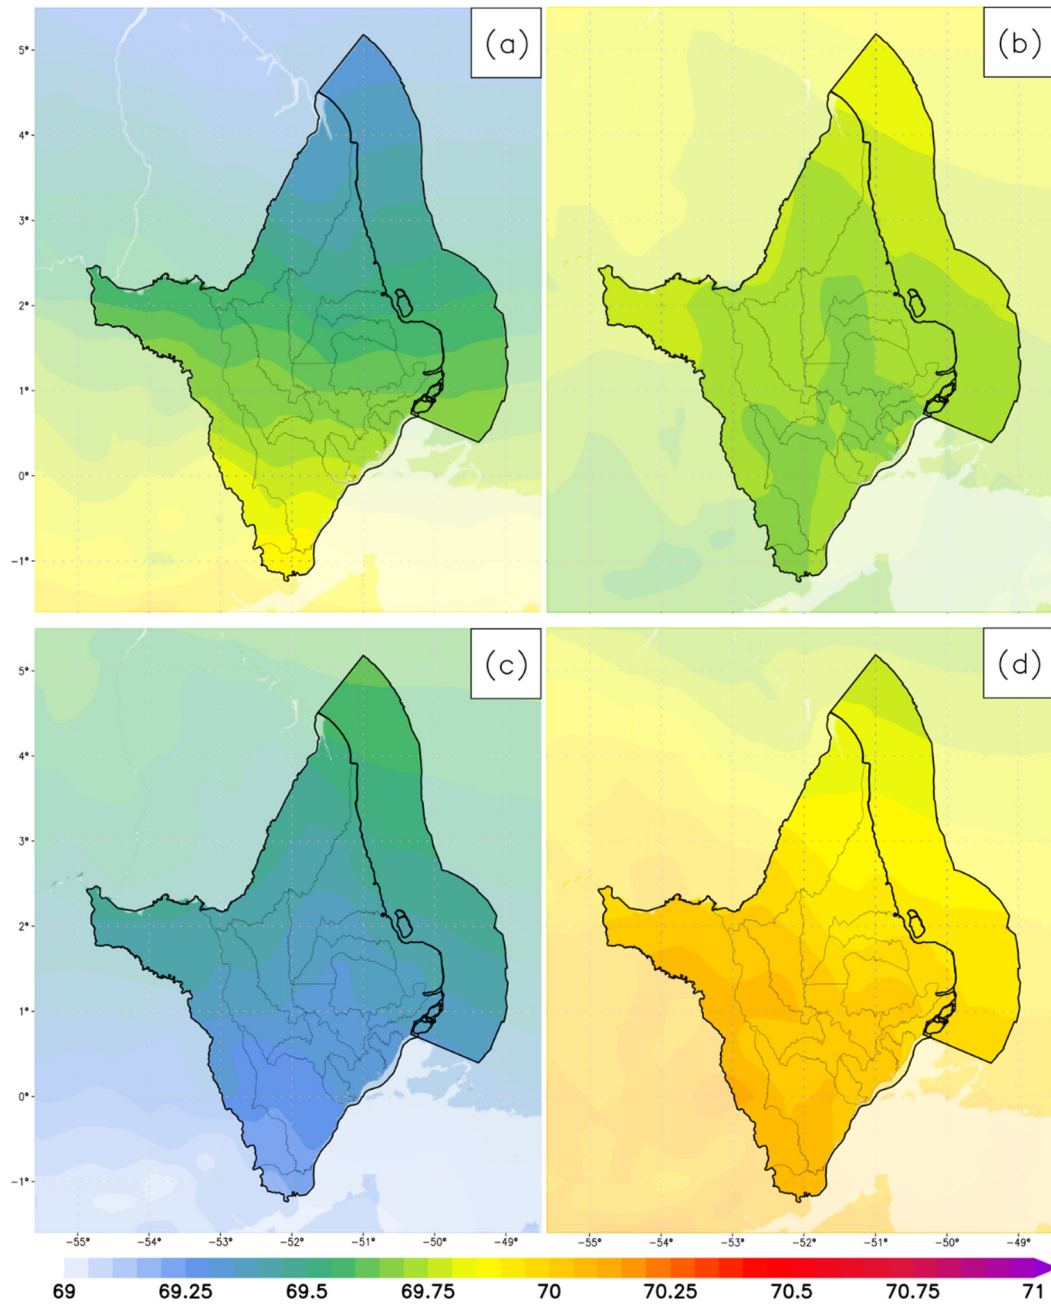

**Figure S3.** Spatial distribution of seasonal mean of the thermal efficiency of concentrated solar power over 30 years (1991-2020) in (a) summer, (b) autumn, (c) winter and (d) spring.
